# Supplementary material for: Blinded, randomized trial of sonographer versus AI cardiac function assessment
Source: PubMed Central journal article supplement (PMC10115627; doi:10.1038/s41586-023-05947-3), 2023-04-05
Supplement: 41586_2023_5947_MOESM2_ESM.pdf [file 41586_2023_5947_MOESM2_ESM.pdf]

## Reporting Summary

Nature Portfolio wishes to improve the reproducibility of the work that we publish. This form provides structure for consistency and transparency in reporting. For further information on Nature Portfolio policies, see our [Editorial Policies](#) and the [Editorial Policy Checklist](#).

### Statistics

For all statistical analyses, confirm that the following items are present in the figure legend, table legend, main text, or Methods section.

n/a Confirmed

- The exact sample size ( $n$ ) for each experimental group/condition, given as a discrete number and unit of measurement
- A statement on whether measurements were taken from distinct samples or whether the same sample was measured repeatedly
- The statistical test(s) used AND whether they are one- or two-sided  
*Only common tests should be described solely by name; describe more complex techniques in the Methods section.*
- A description of all covariates tested
- A description of any assumptions or corrections, such as tests of normality and adjustment for multiple comparisons
- A full description of the statistical parameters including central tendency (e.g. means) or other basic estimates (e.g. regression coefficient) AND variation (e.g. standard deviation) or associated estimates of uncertainty (e.g. confidence intervals)
- For null hypothesis testing, the test statistic (e.g.  $F$ ,  $t$ ,  $r$ ) with confidence intervals, effect sizes, degrees of freedom and  $P$  value noted  
*Give  $P$  values as exact values whenever suitable.*
- For Bayesian analysis, information on the choice of priors and Markov chain Monte Carlo settings
- For hierarchical and complex designs, identification of the appropriate level for tests and full reporting of outcomes
- Estimates of effect sizes (e.g. Cohen's  $d$ , Pearson's  $r$ ), indicating how they were calculated

*Our web collection on [statistics for biologists](#) contains articles on many of the points above.*

### Software and code

Policy information about [availability of computer code](#)

|                 |                                                                                                                                                                                                                                                                                                                                                                                                                                                                                                                                                                                                                                                                                          |
|-----------------|------------------------------------------------------------------------------------------------------------------------------------------------------------------------------------------------------------------------------------------------------------------------------------------------------------------------------------------------------------------------------------------------------------------------------------------------------------------------------------------------------------------------------------------------------------------------------------------------------------------------------------------------------------------------------------------|
| Data collection | Data was collected from the echocardiography laboratories at Stanford Healthcare and Cedars-Sinai Medical Center. Medical imaging were de-identified from initial DICOM files prior to processing by deep learning algorithm. The deep learning algorithm, written in Python with OpenCV (4.5.1.48), Pytorch (1.8.0) and Torchvision (0.9.0). A full list of dependencies is at <a href="https://github.com/echonet/dynamic/blob/master/requirements.txt">https://github.com/echonet/dynamic/blob/master/requirements.txt</a> . Code is available at <a href="https://github.com/echonet/dynamic">https://github.com/echonet/dynamic</a> , was used to assess the echocardiogram videos. |
| Data analysis   | Statistical analysis is detailed in the statistical analysis plan, to be made available at: <a href="https://github.com/echonet/blinded_rct">https://github.com/echonet/blinded_rct</a> . Analyses were performed in R 4.1.0.                                                                                                                                                                                                                                                                                                                                                                                                                                                            |

For manuscripts utilizing custom algorithms or software that are central to the research but not yet described in published literature, software must be made available to editors and reviewers. We strongly encourage code deposition in a community repository (e.g. GitHub). See the Nature Portfolio [guidelines for submitting code & software](#) for further information.

## Data

Policy information about [availability of data](#)

All manuscripts must include a [data availability statement](#). This statement should provide the following information, where applicable:

- Accession codes, unique identifiers, or web links for publicly available datasets
- A description of any restrictions on data availability
- For clinical datasets or third party data, please ensure that the statement adheres to our [policy](#)

The AI model was trained using echocardiogram videos from Stanford Healthcare following Stanford IRB protocol 43721 with waiver of individual consent. A set of de-identified Stanford Healthcare echocardiogram videos is publicly available at <https://echonet.github.io/dynamic/>. The clinical trial was performed at Cedars-Sinai Medical Center under IRB protocol STUDY1707, and the study protocol, statistical analysis plan, and de-identified trial results will be available at [https://github.com/echonet/blinded\\_rct](https://github.com/echonet/blinded_rct). Data requests for identifiable data will be evaluated by the authors to maintain compliance with IRB protocol and data privacy protections. Please email [david.ouyang@cshs.org](mailto:david.ouyang@cshs.org) for requests for identifiable data.

## Human research participants

Policy information about [studies involving human research participants and Sex and Gender in Research](#).

|                             |                                                                                                                                                                                                                                                     |
|-----------------------------|-----------------------------------------------------------------------------------------------------------------------------------------------------------------------------------------------------------------------------------------------------|
| Reporting on sex and gender | Stratified data analysis was reported by sex and the cohort demographics were described in Table 1                                                                                                                                                  |
| Population characteristics  | Detailed cohort characteristics given in Table 1 and Supplementary Table 1                                                                                                                                                                          |
| Recruitment                 | Consecutive echocardiograms from August 2019 were to train the model. Sonographers and cardiologists from the Cedars Sinai Medical Center echo lab were recruited for the study and performed evaluation between February 1, 2022 and July 5, 2022. |
| Ethics oversight            | The AI model was trained using echocardiogram videos from Stanford Healthcare following Stanford IRB protocol 43721 with waiver of individual consent. The clinical trial was performed at Cedars-Sinai Medical Center under IRB protocol STUDY1707 |

Note that full information on the approval of the study protocol must also be provided in the manuscript.

## Field-specific reporting

Please select the one below that is the best fit for your research. If you are not sure, read the appropriate sections before making your selection.

Life sciences     Behavioural & social sciences     Ecological, evolutionary & environmental sciences

For a reference copy of the document with all sections, see [nature.com/documents/nr-reporting-summary-flat.pdf](https://www.nature.com/documents/nr-reporting-summary-flat.pdf)

## Life sciences study design

All studies must disclose on these points even when the disclosure is negative.

|                 |                                                                                                                                                                                                                                            |
|-----------------|--------------------------------------------------------------------------------------------------------------------------------------------------------------------------------------------------------------------------------------------|
| Sample size     | Non-inferiority Design: 8% vs. 5%, alpha of 0.05 and power of 0.9<br>2834 studies needed, pre-planned to enroll 3500 studies as buffer against dropout                                                                                     |
| Data exclusions | A pre-specified run in period was performed where sonographers traced all echocardiogram studies and studies that sonographers could not trace were excluded from randomization. All studies randomized were reevaluated by cardiologists. |
| Replication     | 95% Confidence interval of reported metrics were determined by boot strapping. Trial was only performed once without replication.                                                                                                          |
| Randomization   | Studies were individually randomized 1:1 to AI vs. sonographer as agent of initial interpretation.                                                                                                                                         |
| Blinding        | Cardiologists were blinded to agent of initial interpretation and asked to guess agent of initial interpretation (AI vs. sonographer) in blinded fashion.                                                                                  |

## Reporting for specific materials, systems and methods

We require information from authors about some types of materials, experimental systems and methods used in many studies. Here, indicate whether each material, system or method listed is relevant to your study. If you are not sure if a list item applies to your research, read the appropriate section before selecting a response.

### Materials & experimental systems

| n/a                                 | Involvement in the study                               |
|-------------------------------------|--------------------------------------------------------|
| <input checked="" type="checkbox"/> | <input type="checkbox"/> Antibodies                    |
| <input checked="" type="checkbox"/> | <input type="checkbox"/> Eukaryotic cell lines         |
| <input checked="" type="checkbox"/> | <input type="checkbox"/> Palaeontology and archaeology |
| <input checked="" type="checkbox"/> | <input type="checkbox"/> Animals and other organisms   |
| <input type="checkbox"/>            | <input checked="" type="checkbox"/> Clinical data      |
| <input checked="" type="checkbox"/> | <input type="checkbox"/> Dual use research of concern  |

### Methods

| n/a                                 | Involvement in the study                        |
|-------------------------------------|-------------------------------------------------|
| <input checked="" type="checkbox"/> | <input type="checkbox"/> ChIP-seq               |
| <input checked="" type="checkbox"/> | <input type="checkbox"/> Flow cytometry         |
| <input checked="" type="checkbox"/> | <input type="checkbox"/> MRI-based neuroimaging |

## Clinical data

Policy information about [clinical studies](#)

All manuscripts should comply with the ICMJE [guidelines for publication of clinical research](#) and a completed [CONSORT checklist](#) must be included with all submissions.

|                             |                                                                                                                                                                                                                                                                                                                                                                                                                                                |
|-----------------------------|------------------------------------------------------------------------------------------------------------------------------------------------------------------------------------------------------------------------------------------------------------------------------------------------------------------------------------------------------------------------------------------------------------------------------------------------|
| Clinical trial registration | <a href="https://clinicaltrials.gov/ct2/show/NCT05140642">https://clinicaltrials.gov/ct2/show/NCT05140642</a>                                                                                                                                                                                                                                                                                                                                  |
| Study protocol              | Study protocol in supplementary materials                                                                                                                                                                                                                                                                                                                                                                                                      |
| Data collection             | Data collected from Cedars Sinai Medical Center between February 2, 2021 and July 5, 2022                                                                                                                                                                                                                                                                                                                                                      |
| Outcomes                    | <p>Primary Outcome: Frequency and degree of change from initial (AI vs. sonographer) assessment to final cardiologist assessment<br/>Substantial change defined as more than 5% LVEF</p> <p>Secondary Outcomes:<br/>           Cardiologist Prediction of Agent of Initial Assessment (Blinding Assessment)<br/>           Sonographer Time<br/>           Cardiologist Time<br/>           Change from Historical Cardiologist Assessment</p> |
